1 **Article Type:** Research Letter

2 **Title:** Assessing GPT-4's Diagnostic Accuracy with Darker Skin Tones: Underperformance and  
3 Implications

4 **Authors:** Edgar Akuffo-Addo (MHA)<sup>1\*</sup>, Luna Samman (BA)<sup>2\*</sup>, Leena Munawar (MD)<sup>3</sup>, Maya  
5 Akbik (BS)<sup>4</sup>, Nelly Kokikian (BS)<sup>5</sup>, Raquel Wescott (BS)<sup>6</sup>, Jashin J. Wu (MD)<sup>7</sup>

6 \*Edgar Akuffo-Addo and Luna Samman have contributed equally to this study and should be  
7 considered as co-first authors.

8

9 **Author Affiliation:**

10 <sup>1</sup> Division of Dermatology, Department of Medicine, University of Toronto, Toronto, Ontario,  
11 Canada

12 <sup>2</sup> Rowan School of Osteopathic Medicine, Stratford, New Jersey, USA

13 <sup>3</sup> University of Texas Medical Branch, Galveston, Texas, USA

14 <sup>4</sup> Medical College of Georgia, AU/UGA Medical Partnership, Athens, GA, USA

15 <sup>5</sup> Department of Medicine, Division of Dermatology, David Geffen School of Medicine,  
16 University of California, Los Angeles, California, USA

17 <sup>6</sup> University of Nevada, Reno School of Medicine, Reno, Nevada

18 <sup>7</sup> Department of Dermatology, University of Miami, Miller School of Medicine, Miami, Florida,  
19 USA

20 **Corresponding Author:** Edgar Akuffo-Addo  
21 1 King's College Circle  
22 Toronto, ON M5S 1A8  
23 Email: [edgar.addo@mail.utoronto.ca](mailto:edgar.addo@mail.utoronto.ca)

24 **Manuscript word count:** 489

25 **Supplemental Files:** 0

26 **Keywords:** GPT-4, Images, Dermatology, Darker skin, Underperformance

27  
28  
29  
30  
31  
32  
33  
34  
35  
36  
37  
38  
39  
40  
41  
42  
43  
44  
45  
46  
47  
48  
49

**Competing Interests:** Dr. Wu declares being an investigator, consultant, or speaker for AbbVie, Almirall, Amgen, Arcutis, Aristea Therapeutics, Bausch Health, Boehringer Ingelheim, Bristol Myers Squibb, Dermavant, DermTech, Dr Reddy's Laboratories, Eli Lilly, EPI Health, Galderma, Janssen, LEO Pharma, Mindera, Novartis, Pfizer, Regeneron, Samsung Bioepis, Sanofi Genzyme, Solius, Sun Pharmaceutical Industries, UCB, and Zerigo Health.

**Acknowledgements:** None

**Data Sharing Statement:** The data that support the findings of this study are available from the corresponding author upon reasonable request.

50 **Abstract**

51 **Introduction:** Conversational artificial intelligence (AI) language models like ChatGPT have  
52 emerged as promising tools for patients seeking medical information and guidance. However,  
53 their use raises ethical concerns due to the potential for inaccurate medical advice that could  
54 harm patients. Previous studies in dermatological machine-learning have highlighted that the  
55 underrepresentation of diverse skin types in research could lead to bias and reduced performance  
56 in evaluating skin lesions in darker skin tones. This study aims to assess the accuracy of GPT-4  
57 in generating appropriate differential diagnoses and arriving at the correct diagnoses for common  
58 skin lesions. Additionally, we investigate any differences in its diagnostic accuracy between  
59 darker and lighter skin tones.

60

61 **Method:** Fifty images were randomly selected from the Fitzpatrick 17k dataset, a publicly  
62 available online collection of clinical images labelled with the appropriate diagnoses and skin  
63 types based on the Fitzpatrick scoring system. Half of the images selected represented darker  
64 skin tones, Fitzpatrick IV-VI, and the other half represented lighter skin tones, Fitzpatrick I-II.  
65 For each selected dermatological condition, GPT-4 was presented with pairs of images - one  
66 from a lighter skin tone and another from a darker skin tone. GPT-4 was then asked to provide its  
67 top three differential diagnoses and a final diagnosis for each pair. The responses generated by  
68 GPT-4 were transcribed and compared against the labels provided in the dataset to evaluate  
69 accuracy. Subsequently, a univariate linear regression analysis was conducted to investigate the  
70 relationship between Fitzpatrick skin type and diagnostic accuracy of GPT-4.

71

72 **Results:** Out of the 50 selected images, the distribution of Fitzpatrick skin types was as follows:  
73 40% were Fitzpatrick type I, 10% were type II, 4% were type IV, 26% were type V, and 20%  
74 were type VI. Overall, GPT-4 correctly diagnosed the condition in 28% of the images  
75 (n=14/50), while the correct diagnosis was included in its list of top differentials for 48% of the  
76 images (n=24/50). GPT-4 exhibited better performance in providing the correct diagnosis for  
77 lighter skin tones (44%, n=11/25) compared to darker skin tones (12%, n=3/25), and this was  
78 statistically significant (p-value < 0.05). Furthermore, with each unit increase in the Fitzpatrick  
79 scale, GPT-4s performance decreased by 11.4% in accurately providing a differential diagnosis  
80 and by 7.1% in accurately providing the correct diagnosis.

81

82 **Conclusion:** GPT-4 exhibited significantly lower overall accuracy compared to previous studies  
83 reporting accuracies as high as 90%. This discrepancy highlights GPT-4s potential limitations in  
84 providing accurate information without sufficient clinical context. While GPT-4 could serve as a  
85 valuable learning tool for medical students and dermatology residents, it may not be suitable for  
86 patients seeking clinical input to self-diagnose lesions at home. It is important to note that this  
87 study is limited by its relatively small sample size, which could impact the generalizability of the  
88 findings. If GPT-4 is to be considered for use by patients in a clinical setting, it is important to  
89 ensure that it demonstrates high accuracy and remains unbiased across all patient demographics  
90 and skin types.

91

92

93 **Research letter**

94 Conversational artificial intelligence (AI) language models like ChatGPT have emerged as  
95 promising tools for patients seeking medical information and guidance.<sup>1</sup> However, their use  
96 raises ethical concerns due to the potential for inaccurate medical advice that could harm  
97 patients.<sup>2</sup> Previous studies in dermatological machine-learning have highlighted that the  
98 underrepresentation of diverse skin types in research could lead to bias and reduced performance  
99 in evaluating skin lesions in darker skin tones.<sup>3</sup> This study aims to assess the accuracy of GPT-4  
100 in generating appropriate differential diagnoses and arriving at the correct diagnoses for common  
101 skin lesions. Additionally, we investigate any differences in its diagnostic accuracy between  
102 darker and lighter skin tones.

103

104 Fifty images were randomly selected from the *Fitzpatrick 17k* dataset, a publicly available online  
105 collection of clinical images labelled with the appropriate diagnoses and skin types based on the  
106 Fitzpatrick scoring system.<sup>4</sup> Half of the images selected represented darker skin tones,  
107 Fitzpatrick IV-VI, and the other half represented lighter skin tones, Fitzpatrick I-II. For each  
108 selected dermatological condition, GPT-4 was presented with pairs of images - one from a  
109 lighter skin tone and another from a darker skin tone. GPT-4 was then asked to provide its top  
110 three differential diagnoses and a final diagnosis for each pair. The responses generated by GPT-  
111 4 were transcribed and compared against the labels provided in the dataset to evaluate accuracy.  
112 Subsequently, a univariate linear regression analysis was conducted to investigate the  
113 relationship between Fitzpatrick skin type and diagnostic accuracy of GPT-4.

114

115 Out of the 50 selected images, the distribution of Fitzpatrick skin types was as follows: 40%  
116 were Fitzpatrick type I, 10% were type II, 4% were type IV, 26% were type V, and 20% were  
117 type VI. Overall, GPT-4 correctly diagnosed the condition in 28% of the images (n=14/50),  
118 while the correct diagnosis was included in its list of top differentials for 48% of the images  
119 (n=24/50). GPT-4 exhibited better performance in providing the correct diagnosis for lighter skin  
120 tones (44%, n=11/25) compared to darker skin tones (12%, n=3/25), and this was statistically  
121 significant (p-value < 0.05). Furthermore, with each unit increase in the Fitzpatrick scale, GPT-  
122 4's performance decreased by 11.4% in accurately providing a differential diagnosis and by  
123 7.1% in accurately providing the correct diagnosis.

124  
125 GPT-4's exhibited significantly lower overall accuracy compared to previous studies reporting  
126 accuracies as high as 90%.<sup>5</sup> This discrepancy highlights GPT-4's potential limitations in  
127 providing accurate information without sufficient clinical context. While GPT-4 could serve as a  
128 valuable learning tool for medical students and dermatology residents, it may not be suitable for  
129 patients seeking clinical input to self-diagnose lesions at home. It is important to note that this  
130 study is limited by its relatively small sample size, which could impact the generalizability of the  
131 findings. If GPT-4 is to be considered for use by patients in a clinical setting, it is important to  
132 ensure that it demonstrates high accuracy and remains unbiased across all patient demographics  
133 and skin types.

134

135

136

137

138   References

- 139   1. Shah YB, Ghosh A, Hochberg AR, et al. Comparison of ChatGPT and traditional patient  
140   education materials for men’s health. *Urology Practice*. 2024;11(1):87-94.
- 141   2. Walker HL, Ghani S, Kuemmerli C, et al. Reliability of medical information provided by  
142   ChatGPT: Assessment against clinical guidelines and patient information quality instrument.  
143   *Journal of Medical Internet Research*. 2023;25:e47479.
- 144   3. Guo LN, Lee MS, Kassamali B, Mita C, Nambudiri VE. Bias in, bias out: Underreporting and  
145   underrepresentation of diverse skin types in machine learning research for skin cancer  
146   detection—a scoping review. *J Am Acad Dermatol*. 2022;87(1):157-159.
- 147   4. Groh M, Harris C, Soenksen L, et al. Evaluating deep neural networks trained on clinical  
148   images in dermatology with the fitzpatrick 17k dataset. . 2021:1820-1828.
- 149   5. Passby L, Jenko N, Wernham A. Performance of ChatGPT on specialty certificate  
150   examination in dermatology multiple-choice questions. *Clin Exp Dermatol*. 2023:llad197.
- 151
